# Supplementary material
Source: PubMed Central journal article supplement (PMC4503525)
Supplement: NIHMS647197-supplement-supplement_1.pdf [file NIHMS647197-supplement-supplement_1.pdf]

Supplementary Table 1: Accuracy of family members identified (1<sup>st</sup>/2<sup>nd</sup> degree relatives) by education, health literacy or computer experience, N=70

|                                               | Adjusted for Gender and Education only |               | Adjusted for Gender and REALM only |               | Adjusted for Gender and Computer Experience only |               |
|-----------------------------------------------|----------------------------------------|---------------|------------------------------------|---------------|--------------------------------------------------|---------------|
|                                               | IRR (95% CI)                           | p-value       | IRR (95% CI)                       | p-value       | IRR (95% CI)                                     | p-value       |
| Tool                                          |                                        |               |                                    |               |                                                  |               |
| MFHP (ref)                                    | 1.00                                   | 0.7277        | 1.00                               | 0.3650        | 1.00                                             | 0.6353        |
| VICKY                                         | 1.05 (0.79, 1.41)                      |               | 1.15 (0.85, 1.55)                  |               | 1.07 (0.81, 1.42)                                |               |
| Gender                                        |                                        |               |                                    |               |                                                  |               |
| Female (ref)                                  | 1.00                                   | 0.4127        | 1.00                               | 0.0948        | 1.00                                             | 0.0554        |
| Male                                          | 1.13 (0.84, 1.53)                      |               | 1.29 (0.96, 1.74)                  |               | 1.33 (0.99, 1.77)                                |               |
| Education                                     |                                        |               |                                    |               |                                                  |               |
| HS or less (ref)                              | 1.00                                   | <b>0.0227</b> |                                    |               |                                                  |               |
| > HS                                          | 1.40 (1.05, 1.88)                      |               |                                    |               |                                                  |               |
| REALM grade                                   |                                        |               |                                    |               |                                                  |               |
| 4 <sup>th</sup> – 8 <sup>th</sup> grade (ref) |                                        |               | 1.00                               | <b>0.0161</b> |                                                  |               |
| High school                                   |                                        |               | 1.45 (1.07, 1.96)                  |               |                                                  |               |
| Computer experience                           |                                        |               |                                    |               |                                                  |               |
| Never used/tried few times (ref)              |                                        |               |                                    |               | 1.00                                             | <b>0.0014</b> |
| Use regularly/expert                          |                                        |               |                                    |               | 1.70 (1.23, 2.35)                                |               |

Supplementary Table 2: Accuracy of health conditions identified (total conditions, 1<sup>st</sup>/2<sup>nd</sup> degree relatives) by education, health literacy or computer experience, N=67

|                                               | Adjusted for Gender and Education only |               | Adjusted for Gender and REALM only |               | Adjusted for Gender and Computer Experience only |               |
|-----------------------------------------------|----------------------------------------|---------------|------------------------------------|---------------|--------------------------------------------------|---------------|
|                                               | IRR (95% CI)                           | p-value       | IRR (95% CI)                       | p-value       | IRR (95% CI)                                     | p-value       |
| <b>Tool</b>                                   |                                        |               |                                    |               |                                                  |               |
| MFHP (ref)                                    | 1.00                                   | <b>0.0023</b> | 1.00                               | <b>0.0027</b> | 1.00                                             | <b>0.0084</b> |
| VICKY                                         | 1.66 (1.20, 2.29)                      |               | 1.72 (1.21, 2.45)                  |               | 1.58 (1.12, 2.21)                                |               |
| <b>Gender</b>                                 |                                        |               |                                    |               |                                                  |               |
| Female (ref)                                  | 1.00                                   | 0.0770        | 1.00                               | 0.4032        | 1.00                                             | 0.3858        |
| Male                                          | 0.70 (0.47, 1.04)                      |               | 0.84 (0.56, 1.27)                  |               | 0.84 (0.56, 1.25)                                |               |
| <b>Education</b>                              |                                        |               |                                    |               |                                                  |               |
| HS or less (ref)                              | 1.00                                   | <b>0.0005</b> |                                    |               |                                                  |               |
| > HS                                          | 1.75 (1.28, 2.40)                      |               |                                    |               |                                                  |               |
| <b>REALM grade</b>                            |                                        |               |                                    |               |                                                  |               |
| 4 <sup>th</sup> – 8 <sup>th</sup> grade (ref) |                                        |               | 1.00                               | <b>0.0258</b> |                                                  |               |
| High school                                   |                                        |               | 1.47 (1.05, 2.07)                  |               |                                                  |               |
| <b>Computer experience</b>                    |                                        |               |                                    |               |                                                  |               |
| Never used/tried few times (ref)              |                                        |               |                                    |               | 1.00                                             | <b>0.0189</b> |
| Use regularly/expert                          |                                        |               |                                    |               | 1.63 (1.08, 2.45)                                |               |
